# Supplementary material for: The fungicide effect of HKUST-1 on Aspergillus niger, Fusarium solani and Penicillium chrysogenum
Source: Royal Society of Chemistry journal article supplement (doi:10.1039/c8nj00120k), 2018-01-01
Supplement: c8nj00120k1.pdf [file c8nj00120k1.pdf]

## The fungicide effect of HKUST-1 to *Aspergillus niger*, *Fusarium solani* and *Penicillium chrysogenum*

Vanessa Celis-Arias,<sup>1</sup> Sandra Loera-Serna,<sup>1,\*</sup> Hiram I. Beltrán,<sup>2</sup> J. Carlos Álvarez-Zeferino,<sup>1,3</sup> Efraín Garrido,<sup>4</sup> and Rubén Ruiz-Ramos.<sup>5</sup>

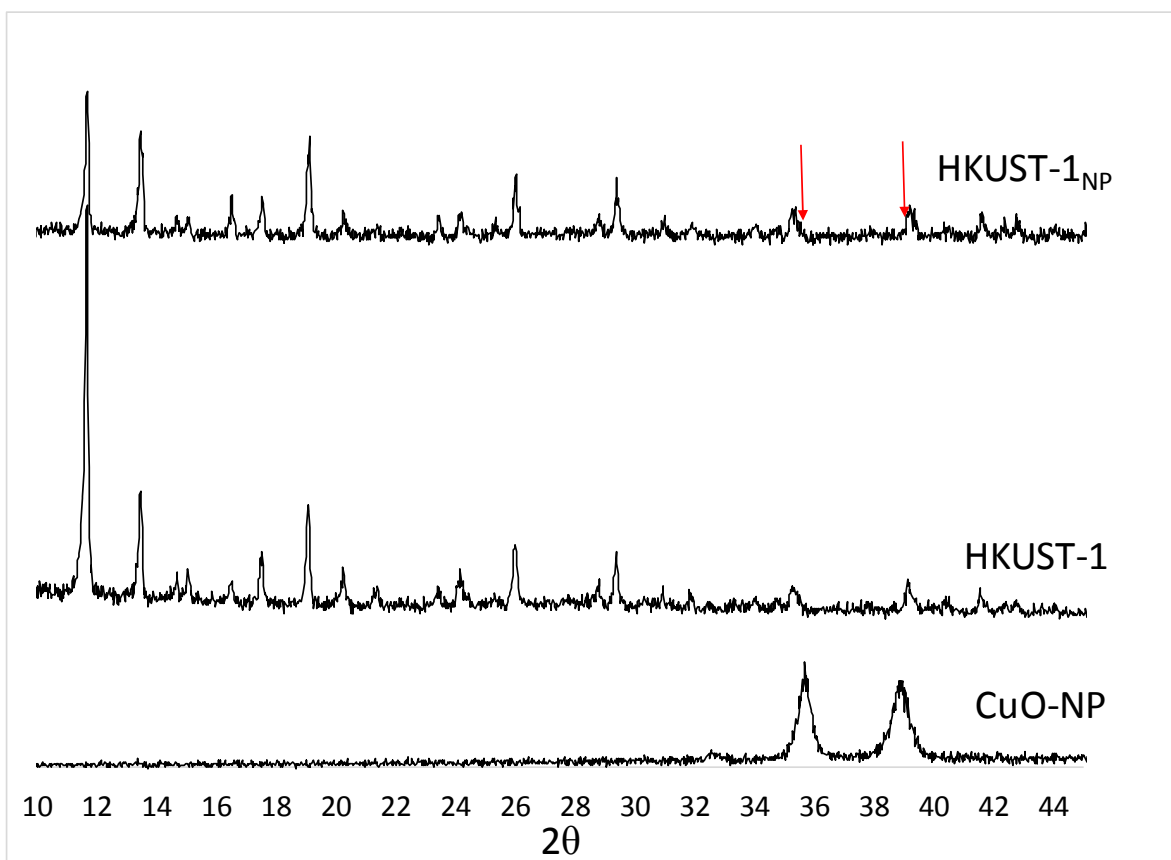

Figure S1. X-ray diffraction patterns of CuO-NP, HKUST-1 and HKUST-1<sub>NP</sub>.

The amount of CuO-NP in the HKUST-1 network is very low, indeed the copper oxide diffraction peaks in the HKUST-1<sub>NP</sub> sample have very low relative intensities.

To determine the presence of these peaks on the HKUST-1 framework the HKUST-1<sub>NP</sub> diffractogram was subtracted of the HKUST-1 diffractogram. The patterns were normalized to peak (400) to 13.50 ( $2\theta$ ), thus obtaining the difference between the two diffractograms, negative peaks attributed to the growth or appearance of new diffraction peaks in the HKUST-1<sub>NP</sub> sample. The peaks marked with an arrow indicate the positions of the peaks assigned to CuO-NP. The negative peaks correspond to the decrease of the relative

intensities of the main peaks of HKUST-1. Such decrease of certain intensities has been observed previously in the hydration changes of the network [1, 2].

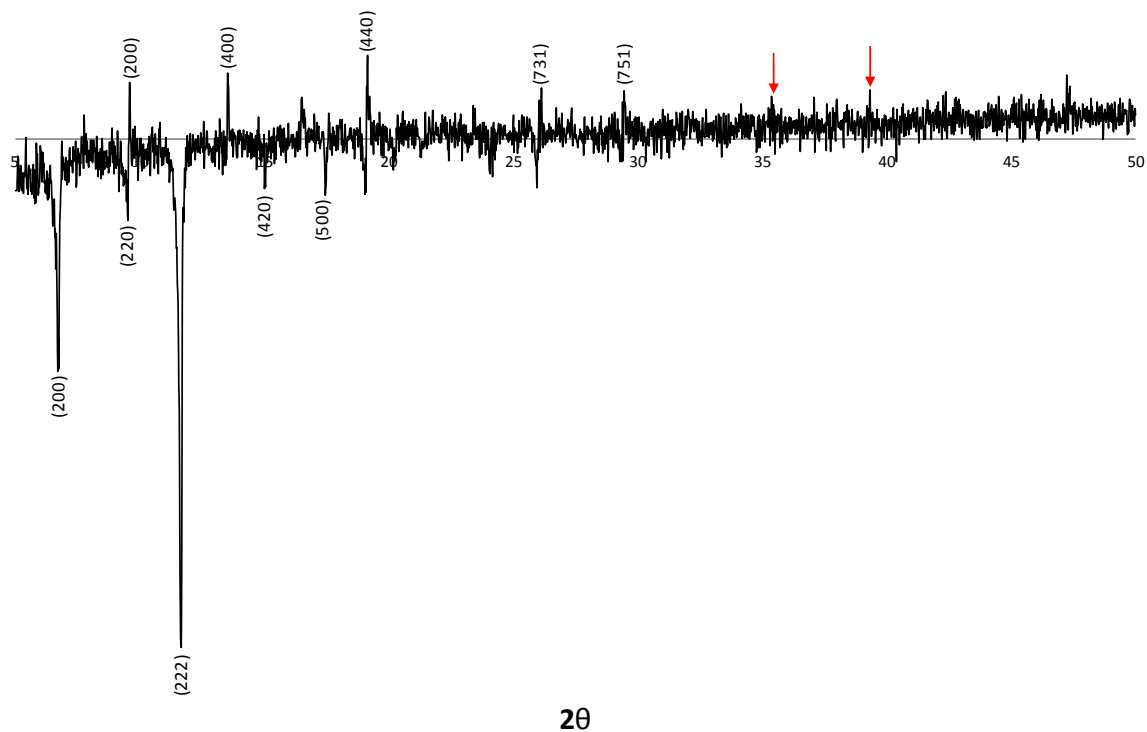

Figure S2. Subtracted X-ray diffraction of the HKUST-1<sub>NP</sub> obtained by Relative Intensity<sub>HKUST-1NP</sub>-I<sub>HKUST-1NP</sub>.

## References

- [1] M. Schlesinger, S. Schulze, M. Hietschold, M. Mehring, *Microporous and Mesoporous Materials*, vol. 132, 2010, pp. 121-127.
- [2] S. Loera-Serna, M.A. Oliver-Tolentino, M. de Lourdes López-Núñez, A. Santana-Cruz, A. Guzmán-Vargas, R. Cabrera-Sierra, H.I. Beltrán, J. Flores, *Journal of Alloys and Compounds*, vol. 540, 2012, pp. 113-120.
